# Supplementary material for: Assessment of the speed of transmission of Ehrlichia canis, Anaplasma phagocytophilum, and Borrelia burgdorferi sensu stricto by infected ticks through an in vitro experimental model
Source: Research Square preprint supplement (doi:10.21203/rs.3.rs-5987937/v1), 2025-03-26

# Assessment of the speed of transmission of *Ehrlichia canis*, *Anaplasma phagocytophilum*, and *Borrelia burgdorferi* sensu stricto by infected ticks through an in vitro experimental model

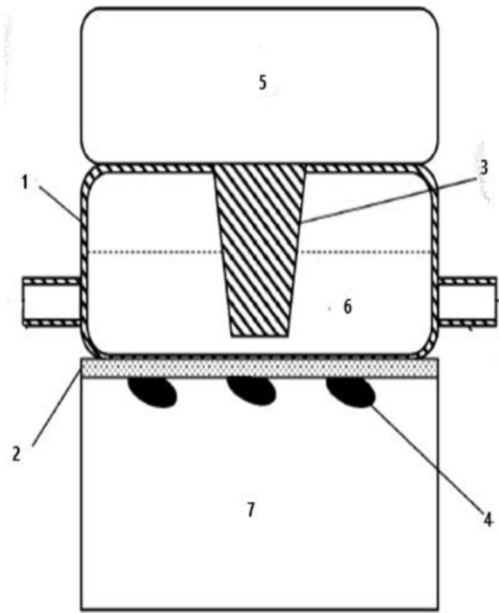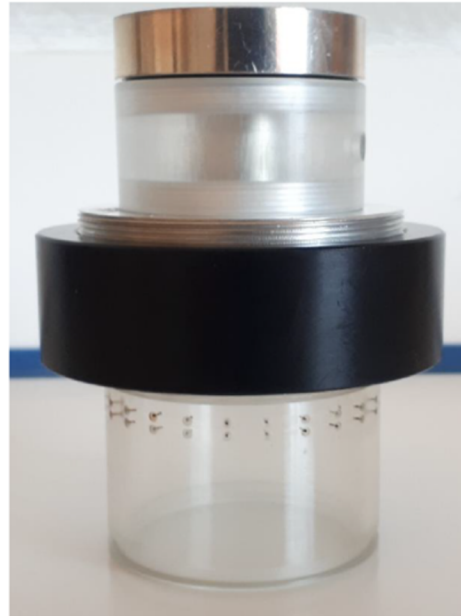

**Figure 1: Feeding Device**

1: Parasite feeding device, 2: Membrane, 3: Heating element extending downward into blood, 4: Ticks attached to the membrane; 5: Heat transfer block for heating element, 6: Blood chamber, 7: Tick chamber

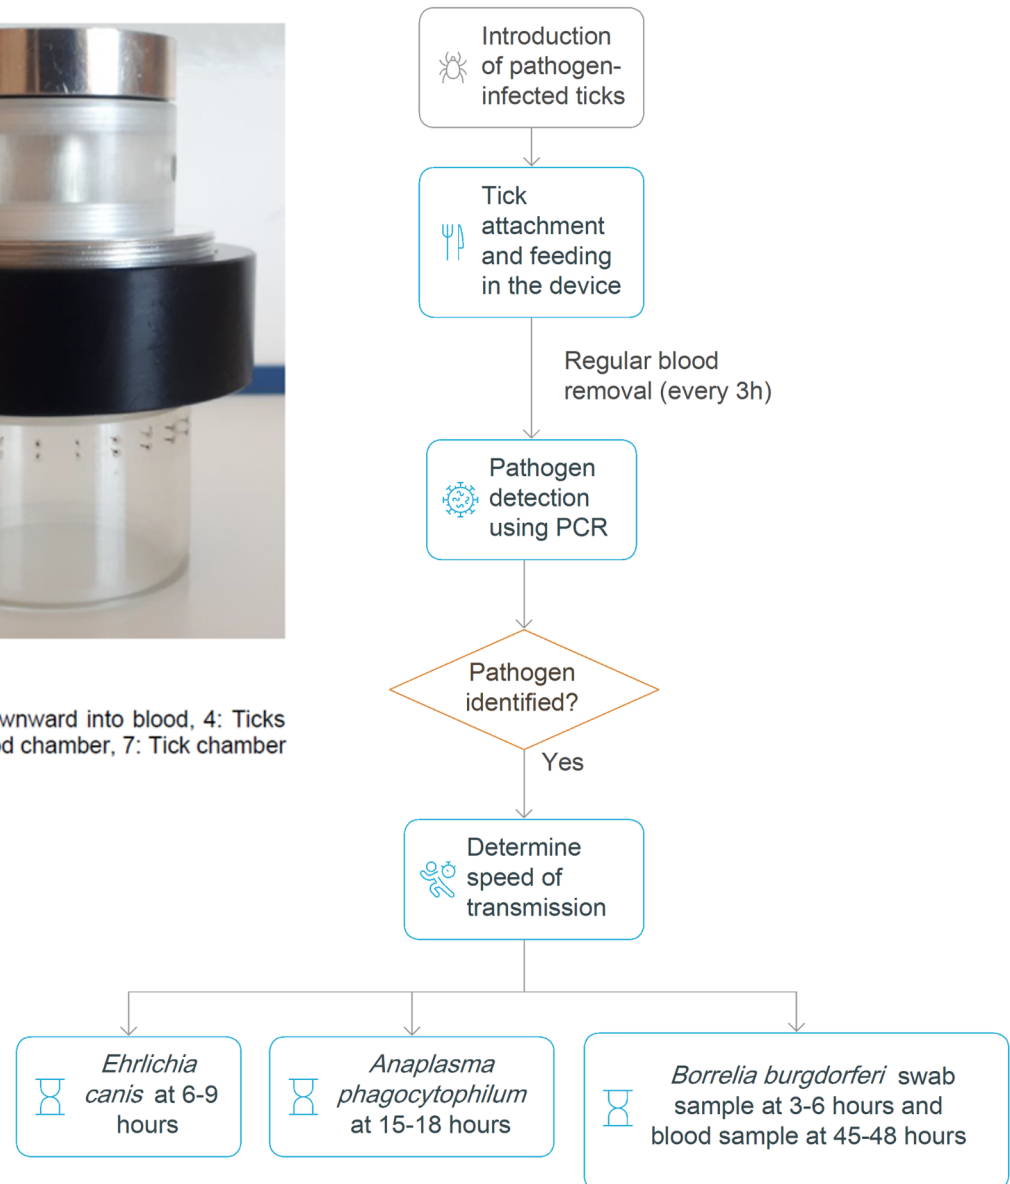

Supplement: Supplementary file 1 [file 3e7d9f58b82a4ba2c3c633b5.pdf]
